# Supplementary material for: Acetate-driven polyoxometalate demetalation: An open-shell diiron polytungstate comprising two rotational Keggin isomers
Source: Royal Society of Chemistry journal article supplement (doi:10.1039/b802147c), 2008-01-01
Supplement: b802147c.pdf [file b802147c.pdf]

*Electronic Supplementary Information for:*

## **Acetate-driven polyoxometalate demetalation: An open-shell di-iron polytungstate comprising two rotational Keggin isomers**

**Bogdan Botar\*<sup>a</sup> and Paul Kögerler<sup>a,b</sup>**

*Institut für Festkörperforschung, Forschungszentrum Jülich GmbH, D-52425 Jülich, Germany. E-mail: b.botar@fz-juelich.de*

*Institut für Anorganische Chemie, RWTH Aachen University, D-52074 Aachen, Germany*

### **Table of Contents:**

Additional data on  $\text{K}_8[(\text{CH}_3)_2\text{NH}_2]_5[(\beta\text{-SiFe}_2\text{W}_{10}\text{O}_{37}(\text{OH}))(\gamma\text{-SiW}_{10}\text{O}_{36})]\cdot 17\text{H}_2\text{O}$  (**K<sub>8</sub>[(CH<sub>3</sub>)<sub>2</sub>(NH<sub>2</sub>)]<sub>5</sub>3**).

1. **Fig. S1** (UV-VIS spectrum)
2. **Fig. S2** (<sup>29</sup>Si NMR spectrum)
3. **Fig. S3** (TGA/DTA data)
4. **Fig. S4** (IR spectrum)
5. Fitting model for magnetic susceptibility data

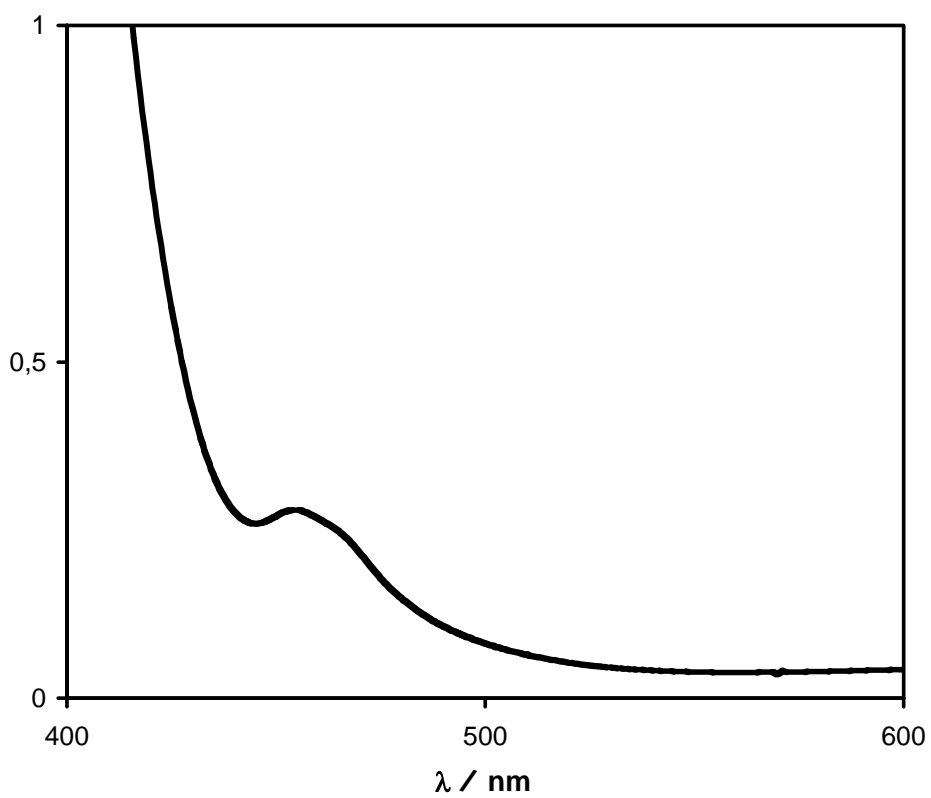

**Fig. S1** Electronic absorption spectrum of a 9 mM aqueous solution of  $\text{K}_8[(\text{CH}_3)_2\text{NH}_2]_5\text{3}$  (at natural pH 5.0).

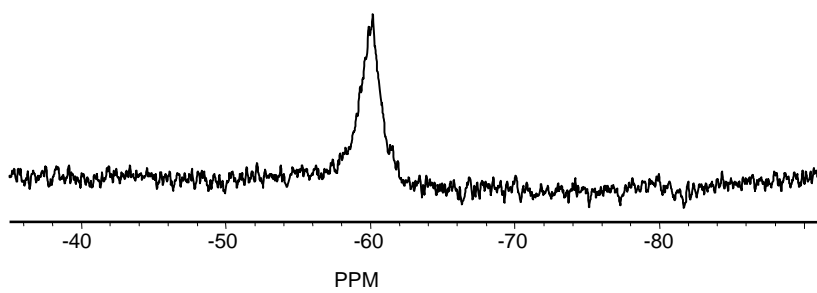

**Fig. S2**  $^{29}\text{Si}$  NMR spectrum of a 60 mM solution of  $\text{K}_8[(\text{CH}_3)_2\text{NH}_2]_5\mathbf{3}$  in  $\text{D}_2\text{O}$ .

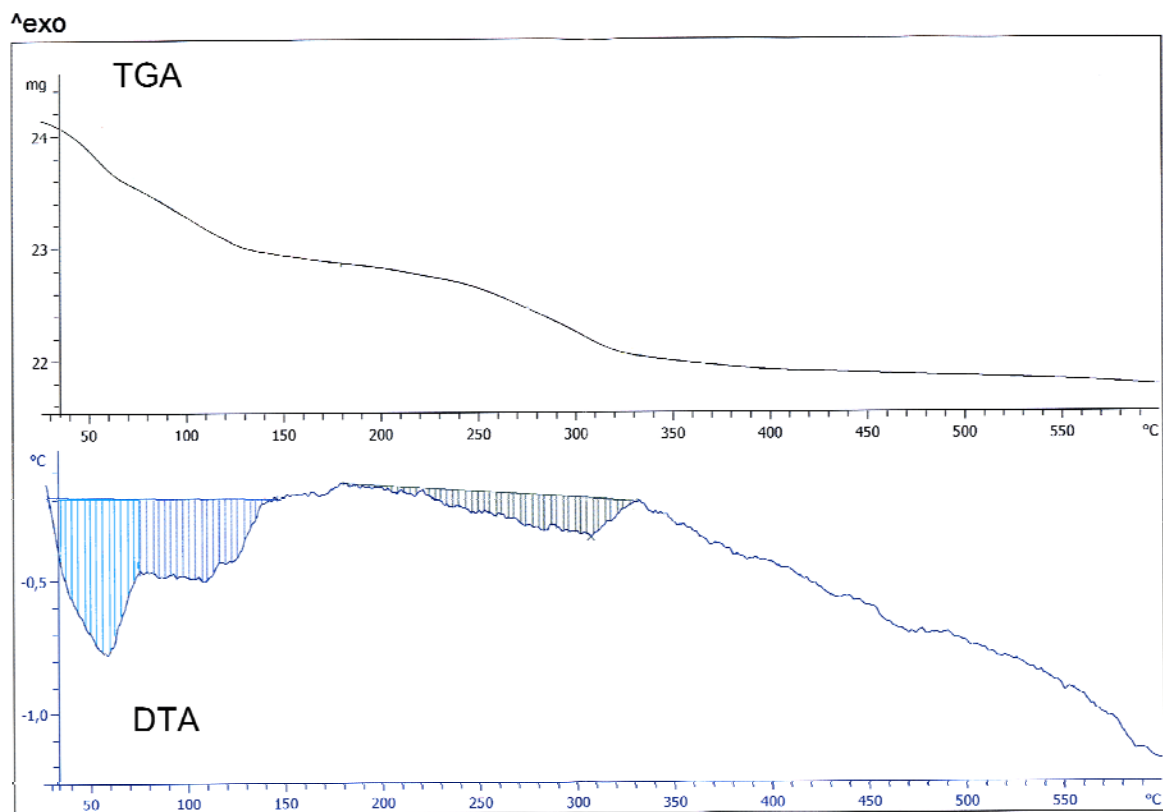

**Fig. S3** TGA (top) and DTA (bottom) data of  $\text{K}_8[(\text{CH}_3)_2(\text{NH}_2)]_5 \cdot 3$  (heating rate: 5 °C/min,  $\text{N}_2$  atmosphere with a 20 ml/min flow rate). The curves show two endothermic weight-loss steps (marked in the DTA graph). The first step up to *ca.* 180 °C corresponds to a loss of 17 crystal water molecules. The second step, up to *ca.* 350 °C, corresponds to the decomposition of the organic dimethylammonium cations.

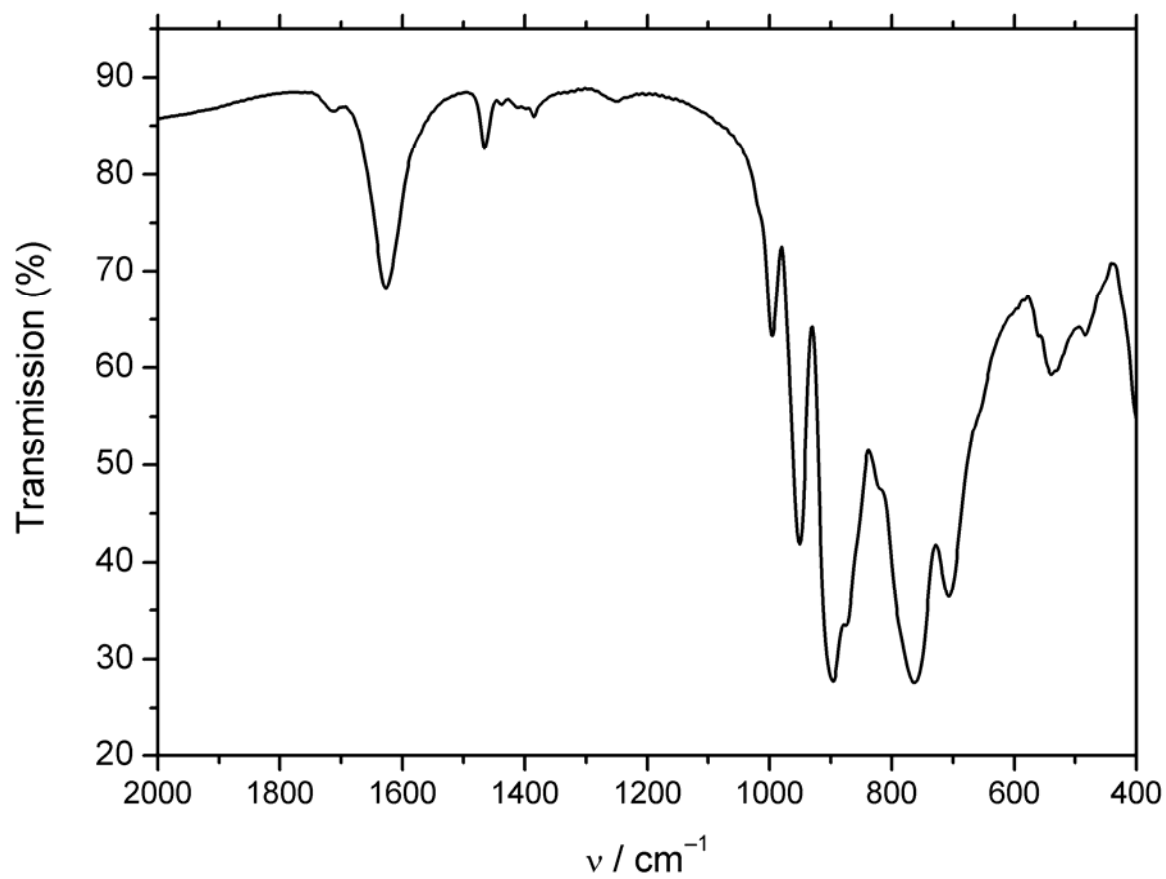

**Fig. S4** FT-IR spectrum of  $\text{K}_8[(\text{CH}_3)_2\text{NH}_2]_{53}$  (KBr pellet).

### Fitting model for magnetic susceptibility data

For the  $s = 5/2$  Fe(III) dimer, the following expression was derived from the Heisenberg spin Hamiltonian to fit the temperature dependence of  $\chi T$ :

$$\chi_{\text{dimer}} T = \alpha \frac{55 + 30e^{10x} + 14e^{18x} + 5e^{24x} + e^{28x}}{11 + 9e^{10x} + 7e^{18x} + 5e^{24x} + 3e^{28x} + e^{30x}}$$

with  $\alpha = \frac{2Ng^2\mu_B^2}{k_B}$  and  $x = -\frac{J}{2k_B T}$ .

The least-squares fit included both  $\chi_{\text{dimer}}$  and a Curie term for  $s = 5/2$ -based paramagnetic impurities.
